# Supplementary material
Source: Springer Nature journal article supplement (https://www.springermedizin.de/resource/supplementary/12946_2009_125_MOESM10_ESM.pdf/9555616)
Supplement: MOESM10 [file 9555616]

| <b>Gene abbreviation</b> | <b>Gene name / synonyme</b>                                  |
|--------------------------|--------------------------------------------------------------|
| Apaf 1                   | Apoptotic protease activating factor 1                       |
| APC                      | Adenomatous polyposis coli                                   |
| Bcl-rambo                | B-cell CLL/lymphoma rambo                                    |
| BTG3                     | B-cell translocation gene                                    |
| CDK5                     | Cyclin dependent kinase 5                                    |
| CDK6                     | Cyclin dependent kinase 6                                    |
| ERK3                     | Mitogen-activated protein kinase 12                          |
| IGFBP3                   | Insulin-like growth factor-binding protein 3                 |
| IGFBP5                   | Insulin-like growth factor-binding protein 5                 |
| KIF 20A                  | Kinesin family member 20 A                                   |
| KIF 4A                   | Kinesin family 4A                                            |
| KIF B                    | Kinesin family member B                                      |
| MAPK13                   | Mitogen activated protein kinase 13                          |
| MAPK6                    | Mitogen activated protein kinase 6                           |
| MAPK8IP2                 | Mitogen activated protein kinase 8-interacting protein 2     |
| MDM2                     | Mouse double minute 2 homolog                                |
| NEDD8                    | Neural precursor cell expressed, development downregulated 8 |
| NFkB                     | Nuclear factor kappa B                                       |
| NME1                     | Nonmetastatic cells 1, protein expressed in                  |
| PTMA                     | Prothymosin, alpha                                           |
| SCYL 2                   | Telomerase associated protein                                |
| UBE2C                    | Ubiquitin-conjugating enzyme E2C                             |
| UBE2M                    | Ubiquitin-conjugating enzyme 2M                              |

**Supplementary table 1.** Full name and synonyms of gene abbreviations used in the article text.
